# Supplementary material for: The development of a core outcome set for studies of pregnant women with multimorbidity
Source: BMC Med. 2023 Aug 21;21:314. doi: 10.1186/s12916-023-03013-3 (PMC10441728; doi:10.1186/s12916-023-03013-3)
Supplement: Supplementary file 4 — Additional file 4. Initial outcomes and rationale for decisions from the research team’s workshops. [file 12916_2023_3013_MOESM4_ESM.xlsx]

## Sheet: Initial outcome lists selection
No	Outcomes	Source	Include for Delphi	Comments
	MATERNAL OUTCOMES
	Maternal: Mortality / survival
1	Maternal death	Literature	Y
	Maternal: Physiological / clinical
	Antenatal
2	Fertility	Focus group	N	Population is not reproductive aged women
3	Impact on long-term health conditions	Focus group	Y
4	Miscarriage	Focus group	Y
5	Termination of pregnancy	Research team	Y
6	Antenatal anxiety / depression	Research team	Combine	Combine with 'Perinatal mental health'
7	Preeclampsia, eclampsia, HELLP syndrome	Literature	Y	Separate 'Hypertensive disorders of/in pregnancy (gestational hypertension, preeclampsia, eclampsia)' into (i) gestational hypertension; (ii) Preeclampsia, eclampsia, HELLP syndrome
8	Gestational hypertension	Research team	Y
9	Obstetric cholestasis	Literature	Y
10	Gestational diabetes mellitus	Literature	Y
11	Chorioamnionitis	Literature	Y
12	Fluid abnormalities on ultrasound (oligohydramnios or polyhydramnios)	Literature	N	Not specific to pregnant women with multimorbidity
13	Oligohydramnios	Literature	N	Not specific to pregnant women with multimorbidity
14	Polyhydramnios	Literature	N	Not specific to pregnant women with multimorbidity
15	Placental abruption	Literature	Y
16	Placental insufficiency	Literature	Y	PPI representative advised to include
17	Placenta previa	Literature	N	Clinicians commented there is no clinical or biological link between this and multimorbidity.
18	Smoking rate at booking	Literature	N	Risk factor for outcomes
19	Nausea / vomiting / dehydration	Literature	Y
20	Hyperemesis gravidarum	Research team	Y
21	Headache	Literature	N	Not specific to pregnant women with multimorbidity
	Peripartum
22	Type of labour onset (e.g. spontaneous, induced)	Literature	Y
23	Spontaneous rupture of membranes	Literature	N	Not specific to pregnant women with multimorbidity
24	Preterm premature rupture of membranes	Literature	Y
25	Mode of birth	Literature	Y	Change to 'Types of birth'
26	Caesarean birth	Literature	Combine	Combine with 'Types of birth'
27	Emergency caesarean section	Literature	Combine	Combine with 'Types of birth'
28	Vaginal birth after previous cesarean section (VBAC)	Literature	Combine	Combine with 'Types of birth'
29	Any instrumental/assisted vaginal birth	Literature	Combine	Combine with 'Types of birth'
30	Normal (i.e., physiological) birth without intervention	Literature	Y
31	Place of birth	Literature	Y	Changes to original preferred place of birth
32	Anaesthesia with gastric reference (Mendelson's syndrome, etc.)	Literature	N	Non specific
33	Types of analgesia (Use of pharmacological analgesia/anaesthesia)	Literature	Y	Separate 'Use of pharmacological analgesia/anaesthesia' into 2 outcomes: 'Types of analgesia' and 'Types of anaesthesia'
34	Types of anaesthesia	Research team	Y
35	‘Drugs’ other than analgesics	Literature	N	Non specific
36	Postnatal administration of drugs	Literature	N	Non specific
37	Induction and/or labour augmentation (artificial rupture of membrane/ oxytocin)	Literature	Combine	Combined 'Induction of labour' with 'Types of labour onset'
38	Oxytocin augmentation of labour	Literature	Y	Change to 'Labour augmentation'
39	Number (count) of pregnancy complications	Literature	N	Non specific
40	Adverse event / outcome, serious complication – maternal	Literature	N	Non specific
41	Maternal near miss	Literature	N	Non specific
42	Procedural or anaesthesia complication	Literature	N	Non specific
43	Medication-related serious adverse events	Literature	N	Non specific
44	Obstetric haemorrhage	Literature	Y
45	Maternal infection	Literature	Y	Infection that led to transfer to ITU / prolonged hospital stay / readmission to hospital / delay in discharge from hospital
46	Cesarean section wound infection	Literature	Combine	Combine with 'Maternal infection'
47	Wound complications	Literature	N	Captured by 'Maternal infection' and 'Recovery time'
48	Placenta (retained, manual removal)	Literature	Y	Change to 'Retained placenta'
49	Ruptured uterus	Literature	N	Not specific to pregnant women with multimorbidity
50	Uterine inversion	Literature	N	Not specific to pregnant women with multimorbidity
51	Uterine (expulsive effort, hyperstimulation, rupture, etc)	Literature	N	Not specific to pregnant women with multimorbidity
52	Laceration (cervical, vaginal, perineal)	Literature	N	Not specific to pregnant women with multimorbidity
53	Perineal/vaginal trauma	Literature	N	Captured by 'Birth injury: 3rd / 4th degree tear'
54	Episiotomy	Literature	N	Captured by 'Birth injury: 3rd / 4th degree tear'
55	Intact perineum	Literature	N	Captured by 'Birth injury: 3rd / 4th degree tear'
56	Third and fourth degree tear	Literature	Y	Change to 'Birth injury' and include 'Obstetric fistula'
57	Thromboembolic event (deep vein thrombosis, pulmonary embolism)	Literature	Y	Move to 'Antenatal'
58	Transfusion	Literature	Y
59	Anaemia	Literature	N	Captured by 'Blood transfusion'
60	Smoking rate at delivery, Smoking cessation in pregnancy	Literature	N	This would be a factor that impact on outcomes, would be treated as a covariate
61	Mobility during labour	Literature	Y
62	Pregnancy prolongation	Literature	N	Not specific to pregnant women with multimorbidity
63	Labour length/duration	Literature	Y
64	Comfort	Literature	N	Captured in 'Birth experience'
65	Maternal perception of pain experienced	Literature	Y	Change to 'Involvement in decisions on pain relief: were you offered the type and amount of pain relief you required'
66	Relaxation	Literature	N	Captured in 'Birth experience'
67	Resuscitation measures, arrest or loss of consciousness	Literature	N	Captured by 'Maternal intensive care admission'
68	Miscellaneous / other	Literature	N	Non specific, catch all category
69	Blood pressure	Literature	N	Captured by 'Maternal intensive care admission' and 'Preeclampsia'
70	Surgical reference, additional operation	Literature	N	Non specific
71	Dilation and curettage for retained products of conception	Literature	N	Not specific to pregnant women with multimorbidity
72	Extension of uterine incision	Literature	N	Not specific to pregnant women with multimorbidity
73	Symphysiotomy	Literature	N	Not specific to pregnant women with multimorbidity
74	Hysterectomy	Literature	Y
75	Respiratory morbidity	Literature	N	Captured in 'Severe maternal morbidity'
76	Renal impairment	Literature	N	Captured in 'Severe maternal morbidity'
77	Tissue injury (bladder and/or bowel injury)	Literature	N	Captured in 'Severe maternal morbidity'
78	Coagulation abnormalities	Literature	N	Captured in 'Severe maternal morbidity'
79	Hepatic complications	Literature	N	Captured in 'Severe maternal morbidity'
80	Cardiac complications	Literature	N	Captured in 'Severe maternal morbidity'
81	Bowel obstruction	Literature	N	Not specific to pregnant women with multimorbidity
82	Pulmonary oedema	Literature	N	Captured in 'Severe maternal morbidity'
83	Abnormal maternal biomarkers	Literature	N	Non specific
84	Severe maternal morbidity (SMM)	Literature	Y
85	Non transfusion SMM	Literature	Combine	Combine with 'Severe maternal morbidity'
86	End organ injury	Literature	Combine	Combine with 'Severe maternal morbidity'
	Postnatal and long-term (beyond birth episode)
87	Recovery time	Focus group	Y
88	Development of new health conditions	Focus group	Y
89	Long-term cardiovascular outcome	Focus group	N	Too specific to certain health conditions. Captured in 'Development of new long-term health condition'
	Maternal mental health
90	Postnatal depression	Literature	Y	Change to 'Perinatal mental health'. Combine all as perinatal mental health and list the individual condition as example. However, keep post-traumatic stress disorder, self harm and suicide as stand alone outcomes.
91	Puerperal psychosis	Literature	N	Combine all as perinatal mental health and list the individual condition as example. However, keep post-traumatic stress disorder, self harm and suicide as stand alone outcomes.
92	Self-harm	Research team	Y
93	Suicide	Research team	Y
94	Post-traumatic stress disorder	Research team	Y
95	Social and peer support	Focus group	Y	Add 'Perinatal mental health support' as a separate outcome to capture support for emotional and mental health
96	Perinatal mental health support	Research team (literature, focus group)	Y
	Maternal: Life impact / functioning
97	Incontinence	Literature	Y
98	Pain with intercourse	Literature	N	Not specific to pregnant women with multimorbidity
99	Health-related quality of life	Literature	Y
100	Well-being	Literature	Y	Emotional & mental well-being
101	Mental health	Literature	Combine	Combine as perinatal mental health
102	Treatment burden	Literature	Y	Treatment burden' to capture burden of self care for the pregnant women, add 'Number of appointments and tests' for both mother and child
103	Number of appointments and tests	Research team (literature, focus group)	Y
104	Self-rated health	Literature	Combine	Combine with health-related quality of life
105	Self-efficacy	Literature	Y
106	Self-management behaviour	Literature	Combine	Combine as 'self efficacy / self management'
107	Perceived/personal control	Literature	Combine	Combine as 'self efficacy / self management'
108	Adherence	Literature	Y	Adherence with medication in pregnancy
109	Change in medication	Focus group	Y
110	Activities of daily living	Literature	Combine	Combine as 'Physical functioning'
111	Physical functioning	Literature	Y
112	Social functioning	Research team	Y
113	Physical activity	Literature	Combine	Combine as 'Physical functioning'
114	Mother-infant attachment, bonding, interaction	Literature	Combine	Combine with 'Parent and infant bonding'
115	Parent and infant bonding	Focus group	Y
116	Maternal guilt	Focus group	Y
117	Pressure as a mother	Focus group	Combine	Combine as 'Maternal guilt and pressure'
118	Confidence with role as a mother	Literature	Y
119	Care giver experience/satisfaction	Literature	N	Captured by impact on partner / family / carer
120	Views (mother's and/or father's)	Literature	N	Non specific
121	Impact on partner / family / carer	Focus group	Y
	Maternal: Resource use, quality of care
122	Health care use	Literature	N	Non specific
123	Late maternal complication	Literature	N	Non specific and would be captured by postnatal readmission
124	High utilisation of perinatal acute care services	Literature	Y
125	Unscheduled visit to the emergency department or clinic	Literature	N	Captured by 'Perinatal acute care services'
126	Hospitalisation	Literature	N	Captured by 'Postnatal admission and readmission' and 'Hospital length of stay'
127	Emergency department visit	Literature	N	Captured by 'Perinatal acute care services'
128	Readmission	Literature	Y	Change to 'Postnatal admission and readmission'
129	High dependency unit/postnatal stay	Literature	Combine	Combine as 'Postnatal admission and readmission'
130	Maternal intensive care unit admission	Literature	Y
131	Need for hospital transfer	Literature	Y
132	Hospital length of stay	Literature	Y
133	Health care cost	Literature	Y	Add 'Financial implications' as a separate outcome to capture cost from a patient's perspective, e.g. time off work, childcare and travel cost to attend appointments. Also need these 2 outcomes separately for mother and child (in total, add 3 outcomes).
134	Financial implication	Research team	Y
135	Communication	Literature	Y	Change to 'information provision to support preparation' as advised by PPI
136	Involvement in care decisions on overall care (Shared decision making)	Literature	Y	Change 'Shared decision making' to 'Involvement in care decisions' and as 4 separate outcomes for these 4 domains: (i) Overall care, (ii) types of birth, (iii) pain relief, and (iv) infant feeding method.
137	Involvement in care decisions on types of birth	Research team (literature, focus group)	Y
138	Involvement in care decisions on infant feeding methods	Research team (literature, focus group)	Y
139	Prioritization	Literature	Combine	Combine with shared decision making
140	Quality health care (patient-rated), satisfaction, confidence in health care provider	Literature	Y	Change to 'Quality of care and experience of care' and add separate outcomes for 'Attitude of health / social care professionals' and 'Confidence in health / social care professionals'
141	Attitude of health / social care professionals	Research team (literature, focus group)	Y
142	Confidence in health / social care professionals	Research team (literature, focus group)	Y
143	Consistency of care	Focus group	Combine	Combine with 'Quality and experience of care'
144	Holistic care / multidisciplinary coordination of care	Focus group	Y	Separate 'Holistic / personalised care' from 'Multidisciplinary coordination of care' and combine 'Holistic care' with 'Personalised care'
145	Personalised care	Focus group	Y
146	Continuity of care	Focus group	Y
147	Accessibility of services	Focus group	Y
148	Hospital facilities / services	Focus group	Y
149	Birth experience	Literature	Y
150	Expectation of care and outcomes	Focus group	N	Satisfaction of whether expectation was met or managed would be captured by 'Quality of care'
151	Preconception care	Focus group	Y	Keep as separate heading, not to combine under generic quality of care. were you satisfied with the preconception care / felt it was informative?
152	Postnatal and long-term care	Focus group	Y
153	Support for the family	Research team (literature, focus group)	Y
154	Care for long-term conditions	Research team	Y
	OUTCOMES FOR CHILDREN
	Children: Mortality / survival
155	Intrauterine fetal demise	Literature	Y	Change to 'Death before birth (fetal, still birth, perinatal death)'
156	Stillbirth	Literature	Combine	Combine as 'Death before birth (fetal, still birth, perinatal death)'
157	Neonatal death	Literature	Y	Change to 'Death after birth (neonatal death, infant death)'
158	Perinatal death	Literature	Combine	Combine as 'Death before birth (fetal, still birth, perinatal death)'
159	Infant death	Research team	Combine	Combine as 'Death after birth (neonatal death, infant death)'
	Children: Physiological / clinical
	Fetal
160	Intrauterine growth restriction	Literature	Y
161	Non-reassuring fetal heart tones	Literature	N	The resulting outcome from this would be Caeserean section or baby's survival and these outcomes are already represented
162	Foetal heart rate monitoring	Literature	N	Process measure
163	Foetal blood sampling	Literature	N	Process measure
164	Foetal position (malpresentation, change, etc.)	Literature	N	No known biological link or clinical observation that this is higher risk in pregnant women with multimorbidity
165	Ultrasound sign	Literature	N	Not specific
166	Abnormal doppler findings on ultrasound	Literature	N	Not specific
167	Twin anaemia-polycythaemia sequence (TAPS)	Literature	N	Limited to twin pregnancy
168	Twin-to-twin transfusion syndrome (TTS) reoccurrence	Literature	N	Limited to twin pregnancy
	Neonatal (first 28 days)
169	Gestational age at birth	Literature	Y
170	Preterm birth	Literature	Combine	Combine with 'Gestational age at birth', then explain this is to help identify preterm, term and post term
171	Prematurity	Literature	Combine	Combine with 'Gestational age at birth', then explain this is to help identify preterm, term and post term
172	Apgar score	Literature	Y
173	Birth weight	Literature	Y
174	Small for gestational age	Literature	Combine	Combine with 'Birth weight'
175	Low birth weight	Literature	Combine	Combine with 'Birth weight'
176	Large for gestational age	Literature	Combine	Combine with 'Birth weight'
177	Meconium stained liquor / meconium aspiration syndrome	Literature	Y
178	Neonatal resuscitation required	Literature	Y
179	Oxygen dependence	Literature	N	The more severe spectrum is captured by 'Chronic lung disease / bronchopulmonary dysplasia'
180	Neonatal respiratory morbidity	Literature	Y	Change to 'Neonatal respiratory distress syndrome'
181	Birth asphyxia	Literature	N	The consequence is captured by 'brain injury on imaging'
182	Any pH levels <7.20 and BD >12. 0	Literature	N	The consequence is captured by 'brain injury on imaging'
183	Hypoxic ischemic encephalopathy	Literature	Y	Change to 'Brain injury on imaging'
184	Babies with encephalopathy	Literature	Combine	Combine as 'Brain injury on imaging'
185	Intraventricular haemorrhage	Literature	Combine	Combine as 'Brain injury on imaging'
186	Periventricular leukomalacia	Literature	Combine	Combine as 'Brain injury on imaging'
187	Retinopathy of prematurity	Literature	Y
188	Neonatal fitting/seizures	Literature	N	Captured by 'Brain injury on imaging'
189	Congenital anomaly	Literature	Y
190	Patent ductus arteriosus	Literature	N	Captured by 'Congenital anomaly'
191	Neonatal infection, sepsis	Literature	Y	Change to 'Neonatal sepsis'
192	Shoulder dystocia	Literature	Y	Move to Maternal outcomes
193	Jaundice	Literature	Y
194	Transition to extra-uterine life	Literature	N	Not specific
195	Necrotizing enterocolitis / bowel perforation	Literature	Y
196	Intubation /ventilation	Literature	Y
197	Hypoglycaemia	Literature	Y
198	Foetal or neonatal anaemia	Literature	Y
199	Inotropic support / hypotension	Literature	N	Captured by 'Admission to neonatal unit'
200	Birth injury to infant	Literature	Y	Change to 'Neonatal birth injury'
201	Peripheral nerve injury (at discharge from hospital)	Literature	Combine	Combine with 'Birth injury to infant'
202	Basal skull fracture	Literature	Combine	Combine with 'Birth injury to infant'
203	Spinal cord injury	Literature	Combine	Combine with 'Birth injury to infant'
204	Hypothermia	Literature	Y
205	Decreased response to pain	Literature	N	Capture by 'Brain injury on imaging'
206	Stupor	Literature	N	Capture by 'Brain injury on imaging'
207	Clinically significant genital injury	Literature	N	Captured by 'Neonatal birth injury'
208	Hypotonia	Literature	N	Capture by 'Brain injury on imaging'
209	Coma	Literature	N	Capture by 'Brain injury on imaging'
210	Tube feeding	Literature	N	Capture by 'Need for complex care'
211	Loss to follow-up	Literature	N	Not specific
212	Ischemic injury	Literature	Combine	Combine with 'Birth injury to infant'
213	Amniotic band syndrome	Literature	N	Captured by 'Congenital anomaly'
214	Systemic inflammatory response syndrome	Literature	N	Captured by 'Admission to neonatal unit'
215	Allergic reaction	Literature	N	Not specific
216	Postnatal administration of drugs	Literature	N	Not specific
217	Adverse event	Research team (Neonatal core outcome set)	N	Not specific
218	Composite of infant morbidity outcomes	Literature	N	Not specific in terms of health conditions that will constitute neonatal morbidity
219	Skin to skin contact	Literature	Y
220	Blood transfusion	Research team	Y
	Infant (first 1 year)
221	Method of infant feeding, breastfeeding	Literature	Y	Add 'Informed and supported with methods of infant feeding'. Move to Maternal outcome.
222	Feeding difficulty	Research team	Y
223	Infant mental health	Focus group	Y	Change to 'Children's mental health & behavioural disorder'
	Longer term
224	Abnormal neurodevelopmental outcome at age 2 years	Literature	Y	Keep 'Neurodevelopmental disorder' as a separate outcome given its importance
225	General gross motor ability (neurodevelopmental)	Research team (Neonatal core outcome set)	Y	Neurodevelopmental disorder' is too broad, need to break it down into the four main categories.
226	General fine motor ability (neurodevelopmental)	Research team	Y	Neurodevelopmental disorder' is too broad, need to break it down into the four main categories.
227	General cognitive ability (neurodevelopmental)	Research team (Neonatal core outcome set)	Y	Neurodevelopmental disorder' is too broad, need to break it down into the four main categories.
228	General social ability (neurodevelopmental)	Research team	Y	Neurodevelopmental disorder' is too broad, need to break it down into the four main categories.
229	Cerebral palsy	Literature	Y	Keep 'Cerebral palsy' as a separate outcome given its importance
230	Faltering growth (previously failure to thrive)	Focus group	Y
231	Metabolic syndrome	Focus group	Y
232	Impact of medication during pregnancy	Focus group	N	The specific outcomes resulting from mother taking medication during pregnancy are already captured (e.g, congenital anomaly,low blood sugar)
233	Inheritance of mother's conditions	Focus group	Y
234	Chronic lung disease / bronchopulmonary dysplasia	Research team (Neonatal core outcome set)	Y
	Children: life impact / functioning
235	Quality of life	Research team (Neonatal core outcome set)	Y
236	Visual impairment or blindness	Research team (Neonatal core outcome set)	Y
237	Hearing impairment or deafness	Research team (Neonatal core outcome set)	Y
238	Education attainment	Research team	Y
239	Participation in society	Focus group	Y
	Children: Resource use
240	Neonatal admission to special care and/or intensive care unit	Literature	Y	Change to 'Admission to neonatal unit' as the categorisation of level of care may not be universal, difficult to separate at different level of care. Give examples of different levels of care.
241	Neonate length of stay	Literature	N	Captured by 'separation of mother from baby'
242	Separation of mother from newborn baby	Focus group	Y
243	Neonatal readmission to hospital	Literature	Y
244	Transfer to long-term care facility	Literature	Y	Change to 'Need for complex care after neonatal unit', give example, needing home ventilation / home nutritional support
245	Number of appointments and tests	Research team (literature, focus group)	Y
246	Pain / distress from test / treatment	Research team	Y
247	Health care cost	Research team	Y
248	Financial implication	Research team	Y

## Sheet: Workshop attendees
1st workshop: Children's outcomes						2nd workshop: Maternal outcomes
Date & Time	8th April 2022, 1300 to 1500					Date & Time	11th April 2022, 1300 to 1500
Role	Number					Role	Number
Data scientist / statistician	8					Data scientist / statistician	5
Public health	5					Public health	3
Patient representative	4					General practitioner	2
General practitioner	2					Health service researcher	2
Obstetrician / Fetal medicine	2					Patient representative	2
Health service researcher	1					Midwife	1
Midwife	1					Obstetrician / Fetal medicine	1
Neonatologist	1					Obstetric phyisican	1
